# Supplementary material for: Comprehensive profiling of the vaginal microbiome in HIV positive women using massive parallel semiconductor sequencing
Source: PubMed Central journal article supplement (PMC3957130; doi:10.1038/srep04398), 2014-03-18
Supplement: srep04398-s1.pdf [file srep04398-s1.pdf]

## **Supplementary Information:**

### **Comprehensive profiling of the vaginal microbiome in HIV positive women using massive parallel semiconductor sequencing**

Adam Ameer <sup>\*a</sup>, Tracy L. Meiring <sup>\*b</sup>, Ignas Bunikis <sup>a</sup>, Susana Häggqvist <sup>a</sup>, Cecilia Lindau <sup>a</sup>, Julia Hedlund Lindberg <sup>a</sup>, Inger Gustavsson <sup>a</sup>, Zizipho Z.A. Mbulawa <sup>b,c</sup>, Anna-Lise Williamson<sup># b,c</sup>, Ulf Gyllensten <sup>#a</sup>

<sup>a</sup> Department of Immunology, Genetics and Pathology, Science for Life Laboratory Uppsala, Uppsala University, Sweden

<sup>b</sup> Institute of Infectious Disease and Molecular Medicine and Division of Medical Virology, Faculty of Health Sciences, University of Cape Town, South Africa

<sup>c</sup> National Health Laboratory Service, South Africa

## Supplementary Figures

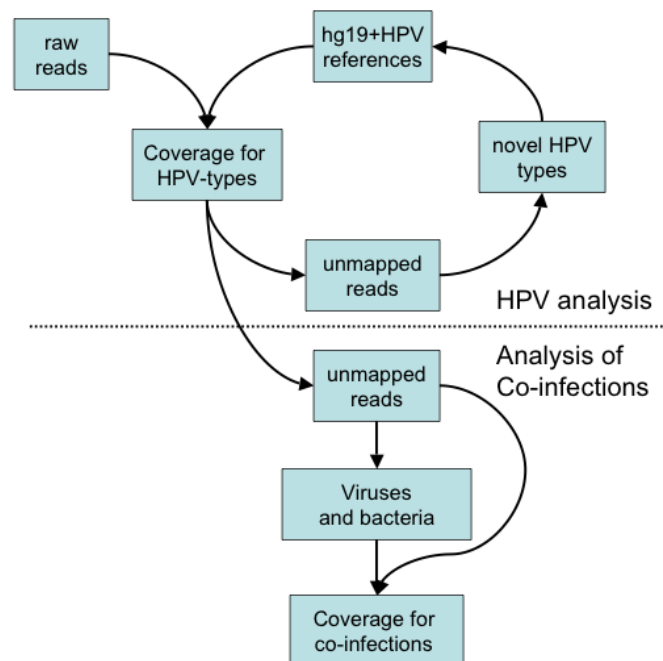

**Supplementary Figure S1. Overview of bioinformatics analysis strategy.** HPV infections are detected through an iterative process. First, sequence reads are mapped to a combined reference consisting of the entire human genome sequence as well as references for known HPV types, resulting in a coverage profile for each of the HPVs. The reads which could not be aligned to any HPV or the human reference (unmapped reads) are processed by a *de novo* assembly, and the resulting contigs are screened for similarities to general HPV gene features. In this way we can detect novel HPV sequences. The novel HPVs are then added to the reference file after which a re-alignment is performed against the updated reference. This process continues until no more novel HPV types are detected. After the HPV analysis is complete, we search for additional non-HPV infections among the remaining unmapped reads. A *de novo* assembly is performed and the resulting contigs are used in BLAST searches against a database with all available nucleotide sequences. Reference sequences for viruses, bacteria and other infectious agents that show very high sequence similarity to the assembled contigs are extracted, and then the unmapped reads are re-aligned against those. In this way we obtain a sequence read coverage that can be used for quantification of the levels of various co-infections.

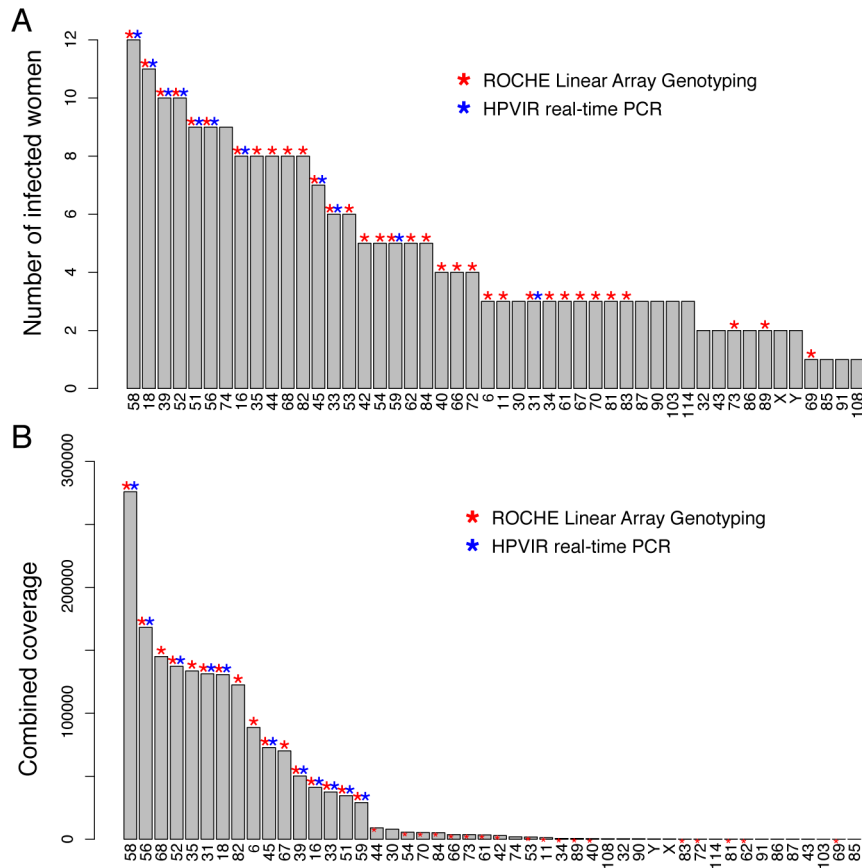

**Supplementary Figure S2. Abundance of HPV types in the 20 samples.** **A)** The gray bars show the number of infected women for each HPV type. In total 48 HPV genotypes were identified (including two novel genotypes HPV X and Y), with some being much more frequent compared to others. **B)** Combined coverage obtained for each HPV type in all of the women. All of the HPV infections with high coverage are present in the ROCHE Linear Array Genotyping (marked by red asterisks) and most of them are also included in the HPVIR real-time PCR test (blue asterisks). There is a long tail of HPV types with low coverage, some of which are not detectable by the genotyping or real-time PCR.

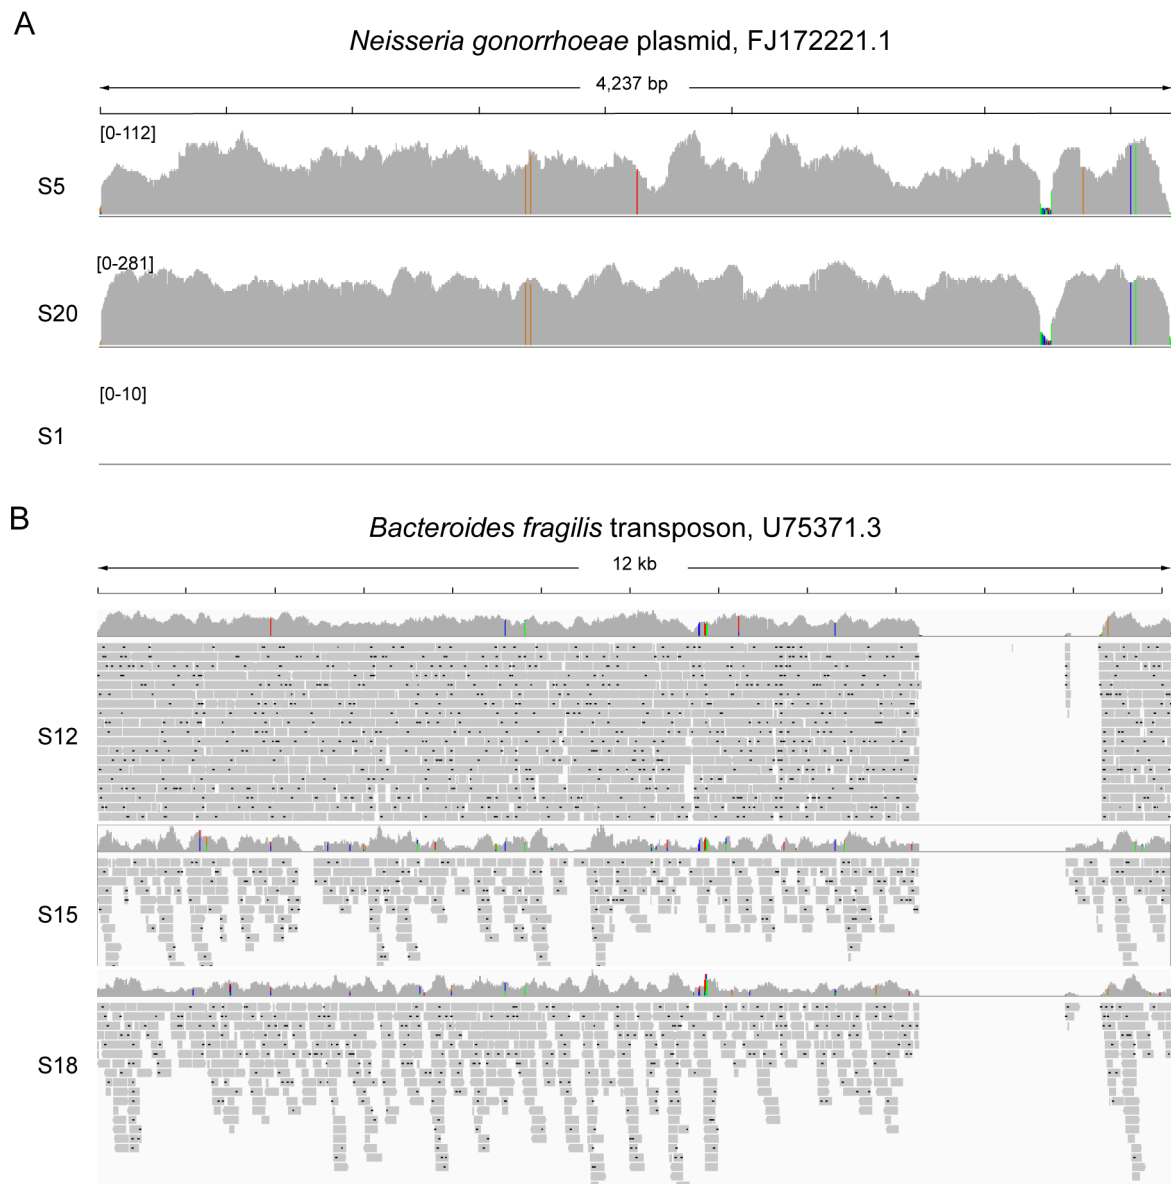

**Supplementary Figure S3. Sequence coverage for non-HPV infections. A)** Coverage profile for an over 4 kb piece of the *Neisseria gonorrhoeae* plasmid in three samples (S1, S5 and S20). The plasmid is clearly present in samples S5 and S20 where the coverage reaches 112X and 281X respectively. In S1 there is not a single read mapped to the plasmid reference. SNPs in samples S5 and S20 are shown as vertical colored lines. There are clearly a number of SNPs both in S5 and S20 of which many are detected in both samples. It is thus possible to study bacterial co-infections at high resolution and even to determine genetic variation between samples. **B)** Coverage profile and individual reads for the *Bacteroides fragilis* transposon U75371.3 in samples S12, S15 and S18. The samples show high coverage across the reference except for a ~2kb region that appears to be deleted in all three samples.

## Supplementary Tables

**Supplementary Table S1.** Ion Proton run information for the 20 samples.

| Sample # | Bases         | ≥Q20 Bases    | No of reads | Mapped reads | Avg read length <sup>a</sup> |
|----------|---------------|---------------|-------------|--------------|------------------------------|
| S1       | 1,123,094,246 | 845,921,658   | 9,340,619   | 9,293,317    | 120                          |
| S2       | 1,127,774,058 | 860,729,845   | 9,475,023   | 9,357,856    | 119                          |
| S3       | 1,124,994,779 | 866,858,532   | 9,355,034   | 9,254,266    | 120                          |
| S4       | 1,173,214,481 | 890,087,842   | 9,910,115   | 9,850,996    | 118                          |
| S5       | 949,846,119   | 726,488,153   | 8,116,682   | 7,960,205    | 117                          |
| S6       | 1,286,638,236 | 901,835,493   | 10,370,987  | 10,164,937   | 124                          |
| S7       | 1,325,653,574 | 935,382,902   | 10,709,737  | 10,613,131   | 123                          |
| S8       | 1,228,708,905 | 870,224,738   | 9,896,537   | 9,789,102    | 124                          |
| S9       | 891,389,357   | 635,020,898   | 7,052,038   | 6,967,029    | 126                          |
| S10      | 1,359,245,507 | 940,175,509   | 10,974,157  | 10,833,021   | 123                          |
| S11      | 1,967,847,805 | 1,314,580,625 | 17,842,951  | 16,985,972   | 110                          |
| S12      | 1,862,343,610 | 1,276,740,852 | 16,246,875  | 15,550,508   | 114                          |
| S13      | 1,857,594,885 | 1,243,793,198 | 16,507,559  | 16,091,184   | 112                          |
| S14      | 1,555,333,269 | 1,040,171,410 | 13,725,450  | 13,482,576   | 113                          |
| S15      | 1,888,085,964 | 1,257,753,806 | 16,665,679  | 16,240,891   | 113                          |
| S16      | 1,180,150,019 | 837,426,989   | 9,905,939   | 8,715,880    | 119                          |
| S17      | 1,354,079,231 | 954,439,784   | 11,522,705  | 11,214,934   | 117                          |
| S18      | 1,199,675,779 | 853,206,452   | 10,142,966  | 9,349,135    | 118                          |
| S19      | 1,056,016,718 | 733,479,972   | 8,962,491   | 8,131,553    | 117                          |
| S20      | 4,400,023,141 | 3,094,815,089 | 38,899,388  | 38,388,505   | 113                          |

<sup>a</sup>Read lengths after quality trimming

**Supplementary Table S2.** Sequence similarity within the L1 gene. Novel HPV types (HPV X and Y) are compared to their evolutionarily closest relatives. In the upper right corner are numbers representing the percent similarity, in the bottom right triangle are number of identical nucleotides.

|         | HPV 101 | HPV X | HPV Y | HPV 103 | HPV 108 |
|---------|---------|-------|-------|---------|---------|
| HPV 101 |         | 78.4  | 65.57 | 67.05   | 67.76   |
| HPV X   | 1216    |       | 65.77 | 66.28   | 67.12   |
| HPV Y   | 1021    | 1024  |       | 67.44   | 66.67   |
| HPV 103 | 1046    | 1036  | 1052  |         | 75.24   |
| HPV 108 | 1057    | 1047  | 1040  | 1167    |         |

**Supplementary Table S3.** Reference sequences from viral, bacterial and parasitic co-infections.

|    | <b>Name</b>                          | <b>Type</b>          | <b>Accession</b> | <b>Ref length</b> |
|----|--------------------------------------|----------------------|------------------|-------------------|
| 1  | <i>Alistipes finegoldii</i>          | complete genome      | CP003274.1       | 3.728 Mb          |
| 2  | <i>Atopobium parvulum</i>            | complete genome      | CP001721.1       | 1.541 Mb          |
| 3  | <i>Bacteroides fragilis</i>          | transposon           | U75371.3         | 12 kb             |
| 4  | <i>Clostridiales genomosp.</i>       | complete genome      | CP001850.2       | 1.806 Mb          |
| 5  | <i>Clostridium tetani</i>            | complete genome      | AE015927.1       | 2.794 Mb          |
| 6  | <i>Enterobacter agglomerans</i>      | plasmid              | AF014880.1       | 2.492 kb          |
| 7  | <i>Fusobacterium nucleatum</i>       | complete genome      | AE009951.2       | 2.171 Mb          |
| 8  | <i>Gardnerella vaginalis</i>         | complete genome      | NC_013721.1      | 1.614 Mb          |
| 9  | <i>JC virus</i>                      | complete genome      | AF004349.1       | 5.112 kb          |
| 10 | <i>Lactobacillus gasseri</i>         | complete genome      | CP000413.1       | 1.891 Mb          |
| 11 | <i>Lactobacillus johnsonii</i>       | complete genome      | NC_005362.1      | 1.989 Mb          |
| 12 | <i>Megasphaera elsdenii</i>          | ribosomal RNA        | NR_103173.1      | 2.907 kb          |
| 13 | <i>Neisseria gonorrhoeae</i>         | plasmid              | FJ172221.1       | 6.053 kb          |
| 14 | <i>Neisseria meningitidis</i>        | plasmid              | AF126482.1       | 5.589 kb          |
| 15 | <i>Porphyromonas asaccharolytica</i> | complete genome      | NC_015501.1      | 2.182 Mb          |
| 16 | <i>Prevotella denticola</i>          | complete genome      | CP002589.1       | 2.932 Mb          |
| 17 | <i>Prevotella melaninogenica</i>     | complete genome      | NC_014370.1      | 3.162 Mb          |
| 18 | <i>Roseburia hominis</i>             | ribosomal RNA        | NR_076921.1      | 2.885 kb          |
| 19 | <i>Salmonella enterica</i>           | plasmid              | NC_021157.1      | 4.668 kb          |
| 20 | <i>SEN virus</i>                     | virus                | AY183662.1       | 3.076 kb          |
| 21 | <i>Streptococcus agalactiae</i>      | complete genome      | NC_021485.1      | 2.135 Mb          |
| 22 | <i>Streptococcus oligofermentans</i> | complete genome      | NC_021175.1      | 2.138 Mb          |
| 23 | <i>Streptococcus pneumoniae</i>      | transposon           | KC488256.1       | 57 kb             |
| 24 | <i>Trichomonas vaginalis</i>         | hypothetical protein | XM_001319996.1   | 3.298 Mb          |
| 25 | <i>Torque teno virus</i>             | virus                | AM712004.1       | 3.754 kb          |

**Supplementary Table S4.** Long contigs (at least 4kb) for which a blastn analysis gives no hit to any known reference sequence.

| Sample | Contig# | Contig length | Contig reads | total ORFs <sup>a</sup> | nr ORF hits <sup>b</sup> | closest relative       | Highest amino acid similarity |
|--------|---------|---------------|--------------|-------------------------|--------------------------|------------------------|-------------------------------|
| S5     | 00001   | 12179         | 19262        | 10                      | 2                        | <i>Bacillus</i>        | 54                            |
| S8     | 00001   | 4163          | 461          | 7                       | 3                        | <i>Eubacterium</i>     | 60                            |
| S8     | 00002   | 4298          | 2712         | 7                       | 2                        | <i>Metascardovia</i>   | 54                            |
| S13    | 00001   | 9648          | 14501        | 10                      | 8                        | <i>Streptococcus</i>   | 74                            |
| S13    | 00002   | 4902          | 527          | 4                       | 3                        | <i>Lactobacillus</i>   | 95                            |
| S15    | 00001   | 6906          | 735          | 9                       | 5                        | <i>Clostridium</i>     | 54                            |
| S15    | 00002   | 5556          | 582          | 14                      | 6                        | <i>Ruminococcus</i>    | 55                            |
| S15    | 00003   | 4148          | 1145         | 6                       | 2                        | <i>Streptococcus</i>   | 64                            |
| S15    | 00004   | 5321          | 496          | 10                      | 4                        | <i>Lachnospiraceae</i> | 60                            |
| S15    | 00005   | 4383          | 573          | 7                       | 2                        | <i>Clostridium</i>     | 54                            |
| S15    | 00006   | 4256          | 441          | 5                       | 3                        | <i>Rhodococcus</i>     | 54                            |
| S16    | 00001   | 25555         | 30141        | 24                      | 13                       | <i>Veillonella</i>     | 62                            |
| S16    | 00010   | 9868          | 991          | 14                      | 6                        | <i>Clostridium</i>     | 59                            |
| S16    | 00011   | 9716          | 1366         | 17                      | 10                       | <i>Clostridium</i>     | 68                            |
| S16    | 00020   | 7835          | 1087         | 13                      | 6                        | <i>Clostridium</i>     | 70                            |
| S16    | 00021   | 7613          | 788          | 12                      | 4                        | <i>Clostridiales</i>   | 68                            |
| S16    | 00022   | 7561          | 931          | 13                      | 7                        | <i>Clostridium</i>     | 63                            |
| S16    | 00024   | 7380          | 1023         | 19                      | 2                        | <i>Lactobacillus</i>   | 50                            |
| S16    | 00025   | 7269          | 832          | 9                       | 2                        | <i>Enterococcus</i>    | 41                            |
| S16    | 00026   | 6961          | 897          | 9                       | 5                        | <i>Clostridium</i>     | 63                            |
| S16    | 00028   | 6586          | 649          | 9                       | 5                        | <i>Clostridium</i>     | 68                            |
| S16    | 00029   | 6490          | 998          | 7                       | 3                        | <i>Streptococcus</i>   | 66                            |
| S16    | 00030   | 6425          | 31051        | 6                       | 4                        | <i>Prevotella</i>      | 87                            |
| S16    | 00032   | 6274          | 577          | 7                       | 6                        | <i>Paenibacillus</i>   | 61                            |
| S16    | 00033   | 6248          | 722          | 9                       | 4                        | <i>Clostridium</i>     | 60                            |
| S16    | 00036   | 6035          | 667          | 5                       | 4                        | <i>Clostridium</i>     | 59                            |
| S16    | 00037   | 5982          | 516          | 11                      | 4                        | <i>Gardnerella</i>     | 69                            |
| S16    | 00038   | 5849          | 853          | 7                       | 4                        | <i>Eubacterium</i>     | 67                            |
| S16    | 00039   | 5834          | 540          | 7                       | 3                        | <i>Clostridiales</i>   | 48                            |
| S16    | 00041   | 5732          | 604          | 9                       | 6                        | <i>Lachnospiraceae</i> | 67                            |
| S16    | 00042   | 5717          | 613          | 7                       | 6                        | <i>Clostridium</i>     | 71                            |
| S16    | 00043   | 5632          | 831          | 6                       | 1                        | <i>Actinomyces</i>     | 44                            |
| S16    | 00045   | 5612          | 690          | 8                       | 5                        | <i>Oribacterium</i>    | 73                            |
| S16    | 00052   | 5269          | 480          | 12                      | 5                        | <i>Lactobacillus</i>   | 68                            |
| S16    | 00056   | 5149          | 463          | 6                       | 5                        | <i>Ruminococcus</i>    | 67                            |
| S16    | 00057   | 5107          | 586          | 5                       | 4                        | <i>Streptococcus</i>   | 58                            |
| S16    | 00059   | 4981          | 531          | 5                       | 3                        | <i>Clostridiales</i>   | 70                            |
| S16    | 00061   | 4927          | 427          | 5                       | 4                        | <i>Firmicutes</i>      | 51                            |
| S16    | 00063   | 4881          | 407          | 6                       | 4                        | <i>Clostridium</i>     | 58                            |
| S16    | 00066   | 4784          | 491          | 6                       | 4                        | <i>Clostridium</i>     | 56                            |
| S16    | 00067   | 4754          | 566          | 8                       | 5                        | <i>Clostridium</i>     | 75                            |
| S16    | 00068   | 4746          | 403          | 6                       | 4                        | <i>Fusobacterium</i>   | 77                            |
| S16    | 00069   | 4738          | 580          | 8                       | 2                        | <i>Parvimonas</i>      | 67                            |
| S16    | 00072   | 4656          | 490          | 7                       | 3                        | <i>Lactobacillus</i>   | 62                            |
| S16    | 00075   | 4581          | 437          | 5                       | 4                        | <i>Clostridium</i>     | 69                            |
| S16    | 00076   | 4502          | 394          | 7                       | 5                        | <i>Clostridium</i>     | 58                            |
| S16    | 00078   | 4419          | 393          | 7                       | 5                        | <i>Clostridium</i>     | 62                            |
| S16    | 00079   | 4391          | 627          | 7                       | 3                        | <i>Clostridium</i>     | 65                            |
| S16    | 00080   | 4387          | 413          | 6                       | 4                        | <i>Clostridiales</i>   | 61                            |
| S16    | 00085   | 4283          | 438          | 7                       | 5                        | <i>Fusobacterium</i>   | 65                            |
| S16    | 00087   | 4219          | 459          | 6                       | 5                        | <i>Oribacterium</i>    | 73                            |
| S16    | 00088   | 4210          | 387          | 7                       | 3                        | <i>Clostridium</i>     | 60                            |
| S16    | 00089   | 4208          | 285          | 7                       | 3                        | <i>Clostridium</i>     | 58                            |
| S16    | 00091   | 4153          | 3549         | 5                       | 2                        | <i>Parabacteroides</i> | 49                            |
| S16    | 00093   | 4134          | 356          | 4                       | 4                        | <i>Clostridium</i>     | 64                            |
| S16    | 00094   | 4105          | 502          | 8                       | 4                        | <i>Lachnospiraceae</i> | 54                            |
| S16    | 00096   | 4027          | 350          | 8                       | 2                        | <i>Clostridium</i>     | 61                            |
| S16    | 00097   | 4030          | 415          | 6                       | 3                        | <i>Clostridium</i>     | 66                            |

|     |       |      |       |   |   |                      |    |
|-----|-------|------|-------|---|---|----------------------|----|
| S16 | 00098 | 4010 | 370   | 5 | 4 | <i>Clostridium</i>   | 70 |
| S18 | 00001 | 5009 | 10848 | 4 | 3 | <i>Streptococcus</i> | 75 |
| S19 | 00001 | 4832 | 1060  | 8 | 4 | <i>Prevotella</i>    | 84 |
| S19 | 00004 | 4151 | 1045  | 5 | 2 | <i>Streptococcus</i> | 64 |

<sup>a</sup> Only ORFs encoding proteins of at least 100 aa are considered

<sup>b</sup> Number of translated ORFs with protein similarity to the organism in the closest relative column, as predicted by blastx
